# Supplementary material for: In silico design of mimosine containing peptides as new efficient chelators of aluminum
Source: Royal Society of Chemistry journal article supplement (doi:10.1039/c8ra10139f), 2019-01-01
Supplement: c8ra10139f1.pdf [file c8ra10139f1.pdf]

## ESI: In Silico Design of Mimosine Containing Peptides as New Efficient Chelators of Aluminum

J. I. Mujika,<sup>a</sup> G. Dalla Torre,<sup>a,b</sup> J. Lachowicz,<sup>c</sup> X. Lopez<sup>\*a</sup>

<sup>a</sup> Kimika Fakultatea, Euskal Herriko Unibertsitatea UPV/EHU, and Donostia International Physics Center (DIPC), P.K. 1072, 20080 Donostia, Euskadi, Spain.

<sup>b</sup> UC BIO/REQUIMTE, Departamento de Química e Bioquímica, Faculdade de Ciências, Universidade do Porto, s/n, Porto, Portugal

<sup>c</sup> University of Cagliari, Department of Chemical and Geological Sciences, Cittadella Universitaria, Monserrato, Italy

- Figure S1: Crystal structure of Al(III)-DFP<sub>3</sub>.
- Figure S2: DFT structures of Al.DFP<sub>3</sub> and Al.Pept<sup>9</sup><sub>3G</sub>.
- Figure S3: RMSD on MD of Al.Peptide complexes.
- Figure S4: RMSD on MD of all peptides in solution.
- Table S1: Geometries on Al.DFP<sub>3</sub> and Al.Pept<sup>9</sup><sub>3G</sub> structures.
- Table S2: Radii of gyration computed on all QM/MM MD simulations.
- Table S3: Average values of all possible O<sup>Mim</sup>-Al-O<sup>Mim</sup> angles.
- Table S4-S11: All individual hydrogen bonds during the QM/MM MD simulations of the apoforms of the eight peptides.
- Table S12-S13: Geometrical parameters of Al-Pept complexes characterized by DFT and PM6.
- Table S14: Binding energies of the Mim-containing peptides calculated with PM6.
- Electron delocalization indices: methods and results.

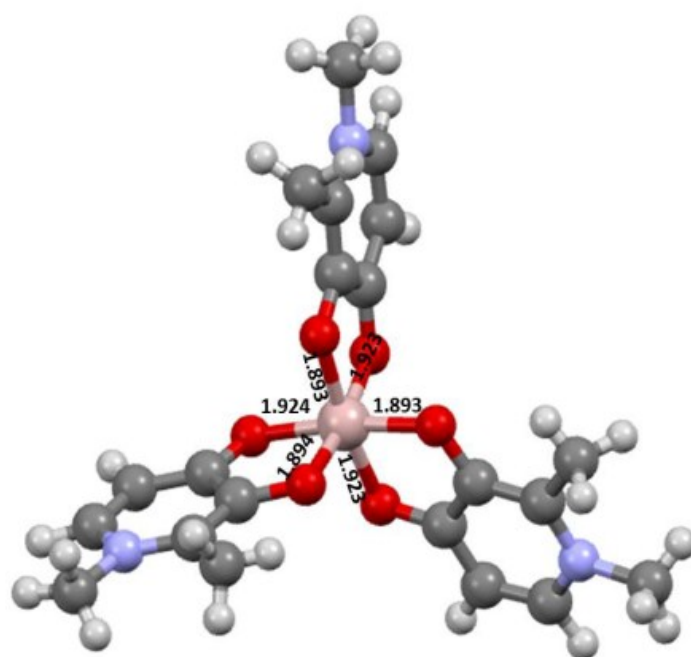

**Figure S1.** Crystal structure of Al(III)-DFP<sub>3</sub>. Al-O distances (Å).

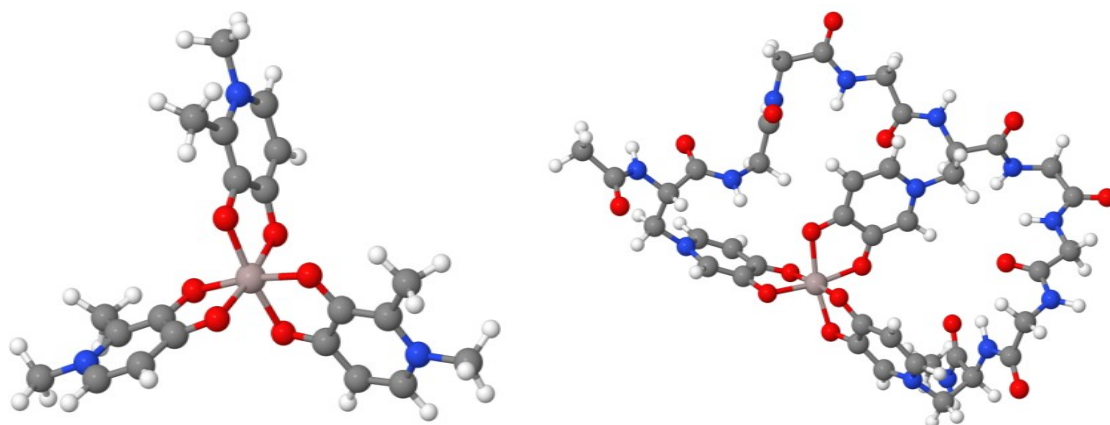

**Figure S2.** DFT structures of Al(III)-DFP<sub>3</sub> (left) and Al-Pept<sub>9</sub><sub>3G</sub> (right).

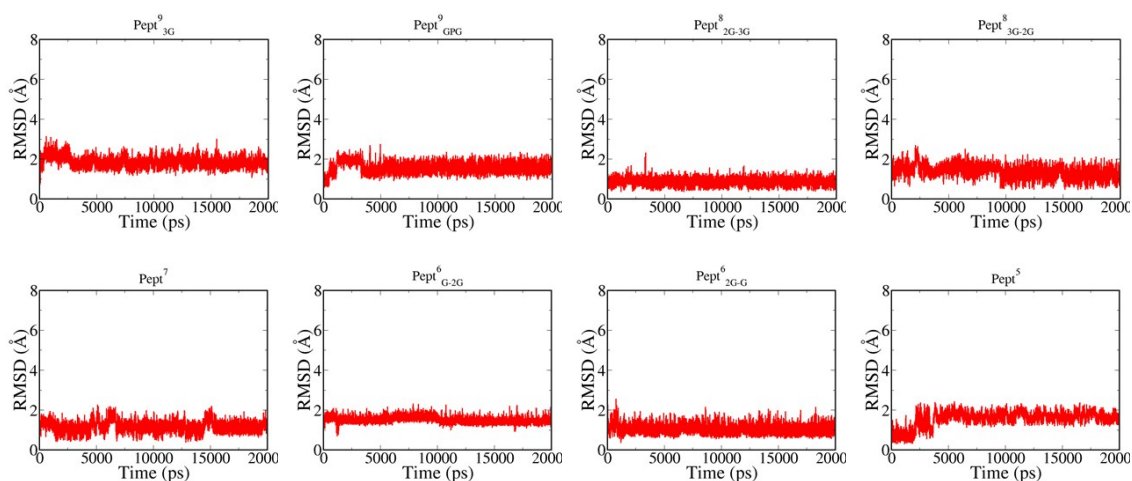

**Figure S3.** Root mean square deviations (RMSD, in Å) computed on the QM/MM MD simulations of the studied eight Al.Peptide complexes. From left to right, upper line: Pept<sup>9</sup><sub>3G</sub>, Pept<sup>9</sup><sub>GPG</sub>, Pept<sup>8</sup><sub>2G-3G</sub> and Pept<sup>8</sup><sub>3G-2G</sub>; Bottom line: Pept<sup>7</sup>, Pept<sup>6</sup><sub>G-2G</sub>, Pept<sup>6</sup><sub>2G-G</sub> and Pept<sup>5</sup>.

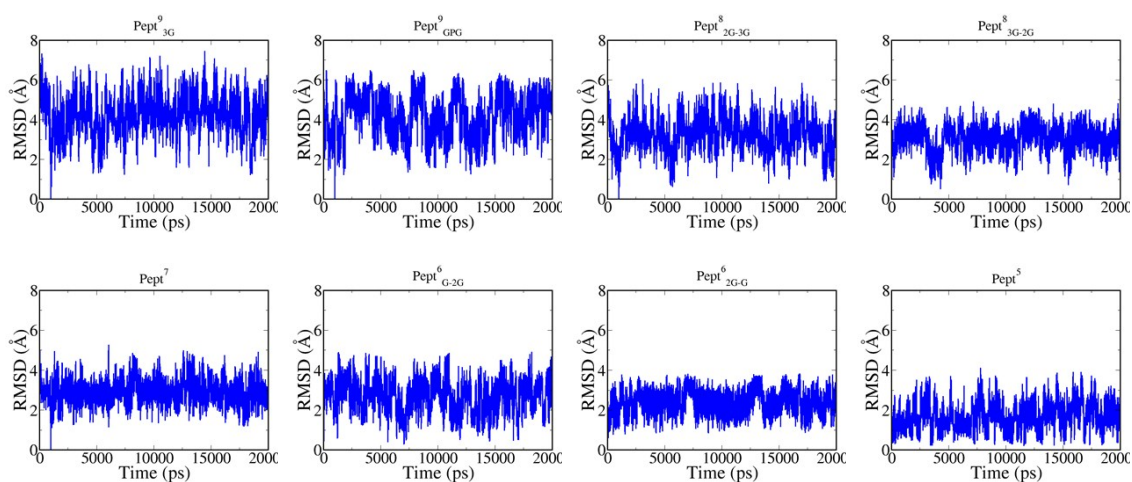

**Figure S4.** Root mean square deviations (RMSD, in Å) computed on the QM/MM MD simulations of the studied eight peptides in solution (their apoform). From left to right, upper line: Pept<sup>9</sup><sub>3G</sub>, Pept<sup>9</sup><sub>GPG</sub>, Pept<sup>8</sup><sub>2G-3G</sub> and Pept<sup>8</sup><sub>3G-2G</sub>; Bottom line: Pept<sup>7</sup>, Pept<sup>6</sup><sub>G-2G</sub>, Pept<sup>6</sup><sub>2G-G</sub> and Pept<sup>5</sup>.

|                              |                              | Al-DFP <sub>3</sub>          |        | Al-Pept <sup>9</sup> <sub>3G</sub> |        |
|------------------------------|------------------------------|------------------------------|--------|------------------------------------|--------|
|                              |                              | X-ray                        | DFT    | DFT                                |        |
| Atom1                        | Atom2                        | Distances                    |        |                                    |        |
| Al                           | O <sub>C</sub> <sup>A</sup>  | 1.924                        | 1.951  | 1.943                              |        |
| Al                           | O <sub>H</sub> <sup>A</sup>  | 1.894                        | 1.916  | 1.903                              |        |
| Al                           | O <sub>C</sub> <sup>B</sup>  | 1.923                        | 1.946  | 1.990                              |        |
| Al                           | O <sub>H</sub> <sup>B</sup>  | 1.893                        | 1.914  | 1.913                              |        |
| Al                           | O <sub>C</sub> <sup>C</sup>  | 1.923                        | 1.945  | 1.954                              |        |
| Al                           | O <sub>H</sub> <sup>C</sup>  | 1.893                        | 1.918  | 1.908                              |        |
| Atom1                        | Atom2                        | Atom3                        | Angles |                                    |        |
| Al                           | O <sub>C</sub> <sup>A</sup>  | C <sub>C</sub> <sup>A</sup>  | 112.22 | 112.18                             | 109.76 |
| Al                           | O <sub>OH</sub> <sup>A</sup> | C <sub>OH</sub> <sup>A</sup> | 111.97 | 112.85                             | 109.81 |
| Al                           | O <sub>C</sub> <sup>B</sup>  | C <sub>C</sub> <sup>B</sup>  | 112.19 | 111.77                             | 110.20 |
| Al                           | O <sub>OH</sub> <sup>B</sup> | C <sub>OH</sub> <sup>B</sup> | 112.22 | 112.32                             | 111.66 |
| Al                           | O <sub>C</sub> <sup>C</sup>  | C <sub>C</sub> <sup>C</sup>  | 111.97 | 112.02                             | 108.96 |
| Al                           | O <sub>OH</sub> <sup>C</sup> | C <sub>OH</sub> <sup>C</sup> | 112.00 | 112.44                             | 108.87 |
| O <sub>C</sub> <sup>A</sup>  | Al                           | O <sub>OH</sub> <sup>A</sup> | 84,23  | 83.57                              | 83.90  |
| O <sub>C</sub> <sup>A</sup>  | Al                           | O <sub>C</sub> <sup>B</sup>  | 89,83  | 90.66                              | 92.73  |
| O <sub>C</sub> <sup>A</sup>  | Al                           | O <sub>OH</sub> <sup>B</sup> | 171,91 | 172.55                             | 93.53  |
| O <sub>C</sub> <sup>A</sup>  | Al                           | O <sub>C</sub> <sup>C</sup>  | 89,79  | 94.12                              | 175.22 |
| O <sub>C</sub> <sup>A</sup>  | Al                           | O <sub>OH</sub> <sup>C</sup> | 95.65  | 90.05                              | 95.10  |
| O <sub>OH</sub> <sup>A</sup> | Al                           | O <sub>C</sub> <sup>B</sup>  | 95.73  | 94.45                              | 88.59  |
| O <sub>OH</sub> <sup>A</sup> | Al                           | O <sub>OH</sub> <sup>B</sup> | 90,87  | 91.52                              | 170.87 |
| O <sub>OH</sub> <sup>A</sup> | Al                           | O <sub>C</sub> <sup>C</sup>  | 171,82 | 91.20                              | 91.63  |
| O <sub>OH</sub> <sup>A</sup> | Al                           | O <sub>OH</sub> <sup>C</sup> | 90,84  | 171.69                             | 100.96 |
| O <sub>C</sub> <sup>B</sup>  | Al                           | O <sub>OH</sub> <sup>B</sup> | 84,25  | 84.12                              | 82.77  |
| O <sub>C</sub> <sup>B</sup>  | Al                           | O <sub>C</sub> <sup>C</sup>  | 89,82  | 172.98                             | 88.85  |
| O <sub>C</sub> <sup>B</sup>  | Al                           | O <sub>OH</sub> <sup>C</sup> | 171,85 | 90.94                              | 168.22 |
| O <sub>OH</sub> <sup>B</sup> | Al                           | O <sub>C</sub> <sup>C</sup>  | 95,68  | 91.58                              | 91.15  |
| O <sub>OH</sub> <sup>B</sup> | Al                           | O <sub>OH</sub> <sup>C</sup> | 90,83  | 95.33                              | 87.98  |
| O <sub>C</sub> <sup>C</sup>  | Al                           | O <sub>OH</sub> <sup>C</sup> | 84,19  | 83.92                              | 84.05  |

**Table S1.** Distances (in Å) and angles (in degrees) computed on the crystal structure of Al(III)-DFP<sub>3</sub>, and the DFT structures of Al(III)-DFP<sub>3</sub> and Al.Pept<sup>9</sup><sub>3G</sub>.

|                                         | <b>Apoform</b> | <b>Al(III)-Peptide</b> |
|-----------------------------------------|----------------|------------------------|
| <b>Pept<sup>9</sup><sub>3G</sub></b>    | 7.68 (1.14)    | 6.78 (0.10)            |
| <b>Pept<sup>9</sup><sub>GPG</sub></b>   | 7.04 (0.97)    | 7.05 (0.11)            |
| <b>Pept<sup>8</sup><sub>2G-3G</sub></b> | 7.15 (1.01)    | 6.56 (0.09)            |
| <b>Pept<sup>8</sup><sub>3G-2G</sub></b> | 7.12 (0.92)    | 6.43 (0.12)            |
| <b>Pept<sup>7</sup></b>                 | 6.49 (0.77)    | 6.25 (0.11)            |
| <b>Pept<sup>6</sup><sub>G-2G</sub></b>  | 6.36 (0.69)    | 5.71 (0.15)            |
| <b>Pept<sup>6</sup><sub>2G-G</sub></b>  | 6.43 (0.70)    | 5.89 (0.13)            |
| <b>Pept<sup>5</sup></b>                 | 5.90 (0.50)    | 5.32 (0.18)            |

**Table S2** Average and standard deviation (in Å) radius of Gyration computed along the QM/MM MD simulation trajectories of the apoform of the peptides in solution and Al-Pept complexes.

|                                                                 | Pept <sup>9</sup> <sub>3G</sub> | Pept <sup>9</sup> <sub>GPG</sub> | Pept <sup>8</sup> <sub>2G-3G</sub> | Pept <sup>8</sup> <sub>3G-2G</sub> | Pept <sup>7</sup> | Pept <sup>6</sup> <sub>G-2G</sub> | Pept <sup>6</sup> <sub>2G-G</sub> | Pept <sup>5</sup> |
|-----------------------------------------------------------------|---------------------------------|----------------------------------|------------------------------------|------------------------------------|-------------------|-----------------------------------|-----------------------------------|-------------------|
| <b>O<sub>C</sub><sup>A</sup>-Al-O<sub>OH</sub><sup>A</sup></b>  | 88.1 (3.6)                      | 87.8 (3.7)                       | 87.6 (3.7)                         | 87.2 (4.0)                         | 88.3 (3.6)        | 88.8 (3.5)                        | 89.0 (3.6)                        | 88.2 (3.7)        |
| <b>O<sub>C</sub><sup>A</sup>-Al-O<sub>C</sub><sup>B</sup></b>   | 91.5 (8.1)                      | 93.7 (7.9)                       | 98.8 (8.1)                         | 86.0 (7.8)                         | 92.6 (16.5)       | 101.7 (27.1)                      | 126.8 (9.2)                       | 129.4 (25.7)      |
| <b>O<sub>C</sub><sup>A</sup>-Al-O<sub>OH</sub><sup>B</sup></b>  | 90.6 (8.6)                      | 87.5 (8.3)                       | 84.8 (7.6)                         | 103.6 (25.5)                       | 134.9 (35.0)      | 93.1 (8.4)                        | 112.3 (10.6)                      | 129.5 (16.8)      |
| <b>O<sub>C</sub><sup>A</sup>-Al-O<sub>C</sub><sup>C</sup></b>   | 168.2 (6.2)                     | 167.3 (6.5)                      | 166.5 (6.5)                        | 156.5 (24.8)                       | 92.5 (11.4)       | 89.7 (8.1)                        | 84.6 (6.6)                        | 84.6 (8.6)        |
| <b>O<sub>C</sub><sup>A</sup>-Al-O<sub>OH</sub><sup>C</sup></b>  | 89.1 (8.5)                      | 85.9 (7.8)                       | 84.9 (7.7)                         | 95.0 (12.7)                        | 122.8 (31.9)      | 165.4 (7.7)                       | 128.9 (13.6)                      | 116.2 (19.4)      |
| <b>O<sub>OH</sub><sup>A</sup>-Al-O<sub>C</sub><sup>B</sup></b>  | 85.9 (7.0)                      | 82.3 (6.4)                       | 80.7 (6.0)                         | 114.8 (37.1)                       | 107.5 (32.8)      | 121.3 (11.4)                      | 120.5 (7.8)                       | 111.2 (11.3)      |
| <b>O<sub>OH</sub><sup>A</sup>-Al-O<sub>OH</sub><sup>B</sup></b> | 167.3 (6.3)                     | 164.3 (7.2)                      | 161.9 (6.9)                        | 135.4 (35.4)                       | 94.3 (14.7)       | 125.5 (8.9)                       | 103.7 (9.0)                       | 95.3 (12.1)       |
| <b>O<sub>OH</sub><sup>A</sup>-Al-O<sub>C</sub><sup>C</sup></b>  | 90.6 (8.1)                      | 94.2 (8.5)                       | 96.7 (8.2)                         | 84.5 (7.5)                         | 144.9 (30.4)      | 117.8 (10.6)                      | 158.8 (11.4)                      | 155.7 (24.9)      |
| <b>O<sub>OH</sub><sup>A</sup>-Al-O<sub>OH</sub><sup>C</sup></b> | 100.7 (8.4)                     | 101.1 (8.9)                      | 103.5 (8.5)                        | 107.3 (23.9)                       | 89.6 (16.5)       | 83.4 (6.8)                        | 83.5 (7.2)                        | 94.1 (10.2)       |
| <b>O<sub>C</sub><sup>B</sup>-Al-O<sub>OH</sub><sup>B</sup></b>  | 87.3 (3.7)                      | 86.8 (4.2)                       | 86.9 (3.8)                         | 84.5 (7.5)                         | 72.4 (25.2)       | 29.9 (11.3)                       | 26.2 (9.9)                        | 28.4 (18.8)       |
| <b>O<sub>C</sub><sup>B</sup>-Al-O<sub>C</sub><sup>C</sup></b>   | 91.8 (9.4)                      | 92.7 (9.0)                       | 89.1 (8.5)                         | 107.1 (25.8)                       | 98.6 (17.3)       | 111.7 (17.2)                      | 77.2 (10.7)                       | 86.5 (23.8)       |
| <b>O<sub>C</sub><sup>B</sup>-Al-O<sub>OH</sub><sup>C</sup></b>  | 167.3 (6.2)                     | 168.3 (6.3)                      | 168.1 (6.1)                        | 127.2 (42.8)                       | 135.6 (36.1)      | 87.7 (25.4)                       | 98.7 (9.4)                        | 103.5 (12.5)      |
| <b>O<sub>OH</sub><sup>B</sup>-Al-O<sub>C</sub><sup>C</sup></b>  | 91.3 (7.9)                      | 91.8 (7.9)                       | 92.6 (8.0)                         | 89.3 (8.9)                         | 108.9 (32.8)      | 115.7 (9.3)                       | 95.2 (9.7)                        | 98.7 (14.9)       |
| <b>O<sub>OH</sub><sup>B</sup>-Al-O<sub>OH</sub><sup>C</sup></b> | 86.5 (7.0)                      | 90.1 (8.1)                       | 89.6 (7.5)                         | 110.3 (35.0)                       | 94.6 (13.1)       | 96.7 (7.9)                        | 117.6 (8.9)                       | 112.6 (10.6)      |
| <b>O<sub>C</sub><sup>C</sup>-Al-O<sub>OH</sub><sup>C</sup></b>  | 87.9 (3.7)                      | 88.0 (3.8)                       | 87.3 (3.8)                         | 88.3 (3.6)                         | 88.0 (3.8)        | 89.5 (3.6)                        | 88.9 (3.6)                        | 85.2 (16.5)       |

**Table S3** Average values (and their standard deviations) of all possible O<sup>Mim</sup>-Al-O<sup>Mim</sup> angles computed along the standard MD simulation trajectories of the Al-Pept complexes. Since the indexes of the three Mimosine residues differ on the systems, they are referred to as A, B and C for the first, central and last Mimosine in the corresponding sequence shown in Figure 1.

| <b>#Acceptor</b> | <b>DonorH</b> | <b>Donor</b> | <b>Frames</b> | <b>Frac</b> | <b>AvgDist</b> | <b>AvgAng</b> |
|------------------|---------------|--------------|---------------|-------------|----------------|---------------|
| GLY_3@O          | GLY_5@H       | GLY_5@N      | 215           | 0.0108      | 2.8785         | 146.3374      |
| GLY_7@O          | GLY_9@H       | GLY_9@N      | 212           | 0.0107      | 2.8822         | 146.6055      |
| MIH_2@O          | GLY_4@H       | GLY_4@N      | 115           | 0.0058      | 2.9048         | 144.1116      |
| GLY_3@O          | GLY_7@H       | GLY_7@N      | 108           | 0.0054      | 2.8808         | 155.7838      |
| MIH_6@O          | GLY_8@H       | GLY_8@N      | 108           | 0.0054      | 2.9069         | 145.295       |
| GLY_4@O          | GLY_8@H       | GLY_8@N      | 105           | 0.0053      | 2.8992         | 148.6666      |
| GLY_7@O          | NME_11@H      | NME_11@N     | 103           | 0.0052      | 2.9102         | 158.7487      |
| GLY_5@O          | GLY_8@H       | GLY_8@N      | 88            | 0.0044      | 2.9053         | 151.2934      |
| MIH_6@O          | GLY_9@H       | GLY_9@N      | 83            | 0.0042      | 2.9332         | 149.4445      |
| MIH_2@O          | GLY_5@H       | GLY_5@N      | 79            | 0.004       | 2.9273         | 150.6268      |
| GLY_8@O          | GLY_5@H       | GLY_5@N      | 76            | 0.0038      | 2.8772         | 152.9991      |
| GLY_8@O          | MIH_10@H      | MIH_10@N     | 74            | 0.0037      | 2.8827         | 143.9258      |
| GLY_3@O          | MIH_6@H       | MIH_6@N      | 70            | 0.0035      | 2.9301         | 153.4352      |
| GLY_4@O          | MIH_6@H       | MIH_6@N      | 67            | 0.0034      | 2.8916         | 143.8881      |
| GLY_7@O          | MIH_10@H      | MIH_10@N     | 65            | 0.0033      | 2.9414         | 155.0316      |
| ACE_1@O          | GLY_4@H       | GLY_4@N      | 61            | 0.0031      | 2.9071         | 151.0677      |
| GLY_3@O          | GLY_8@H       | GLY_8@N      | 57            | 0.0029      | 2.8701         | 147.764       |
| GLY_4@O          | GLY_9@H       | GLY_9@N      | 47            | 0.0024      | 2.8802         | 150.0839      |
| GLY_9@O          | NME_11@H      | NME_11@N     | 40            | 0.002       | 2.9071         | 142.9866      |
| GLY_5@O          | GLY_7@H       | GLY_7@N      | 38            | 0.0019      | 2.9128         | 143.2313      |
| GLY_5@O          | GLY_9@H       | GLY_9@N      | 36            | 0.0018      | 2.8748         | 154.2794      |
| ACE_1@O          | GLY_8@H       | GLY_8@N      | 35            | 0.0018      | 2.8871         | 155.9333      |
| GLY_9@O          | GLY_4@H       | GLY_4@N      | 33            | 0.0017      | 2.8694         | 154.1742      |
| ACE_1@O          | GLY_3@H       | GLY_3@N      | 32            | 0.0016      | 2.9065         | 145.3006      |
| GLY_3@O          | GLY_9@H       | GLY_9@N      | 30            | 0.0015      | 2.885          | 148.2627      |
| GLY_3@O          | NME_11@H      | NME_11@N     | 25            | 0.0013      | 2.9134         | 159.6403      |
| GLY_9@O          | GLY_5@H       | GLY_5@N      | 23            | 0.0012      | 2.8768         | 153.1714      |
| GLY_4@O          | GLY_7@H       | GLY_7@N      | 19            | 0.001       | 2.9105         | 151.6243      |
| GLY_9@O          | GLY_3@H       | GLY_3@N      | 18            | 0.0009      | 2.8835         | 152.2386      |

|          |          |          |    |        |        |          |
|----------|----------|----------|----|--------|--------|----------|
| GLY_8@O  | GLY_4@H  | GLY_4@N  | 18 | 0.0009 | 2.8916 | 153.0775 |
| ACE_1@O  | GLY_5@H  | GLY_5@N  | 18 | 0.0009 | 2.8945 | 153.0308 |
| MIH_6@O  | MIH_2@H  | MIH_2@N  | 18 | 0.0009 | 2.9474 | 155.769  |
| ACE_1@O  | GLY_7@H  | GLY_7@N  | 16 | 0.0008 | 2.8653 | 156.489  |
| GLY_7@O  | GLY_4@H  | GLY_4@N  | 16 | 0.0008 | 2.91   | 160.0729 |
| GLY_8@O  | GLY_3@H  | GLY_3@N  | 14 | 0.0007 | 2.8735 | 154.0044 |
| ACE_1@O  | GLY_9@H  | GLY_9@N  | 10 | 0.0005 | 2.8745 | 155.7919 |
| ACE_1@O  | NME_11@H | NME_11@N | 10 | 0.0005 | 2.8876 | 164.7855 |
| GLY_8@O  | NME_11@H | NME_11@N | 9  | 0.0005 | 2.8826 | 161.073  |
| GLY_5@O  | MIH_2@H  | MIH_2@N  | 9  | 0.0005 | 2.9112 | 159.5201 |
| GLY_7@O  | GLY_3@H  | GLY_3@N  | 9  | 0.0005 | 2.9287 | 147.5528 |
| GLY_9@O  | MIH_6@H  | MIH_6@N  | 9  | 0.0005 | 2.9326 | 161.5631 |
| GLY_5@O  | NME_11@H | NME_11@N | 8  | 0.0004 | 2.9105 | 152.8098 |
| MIH_6@O  | MIH_10@H | MIH_10@N | 8  | 0.0004 | 2.9398 | 149.5473 |
| MIH_6@O  | GLY_3@H  | GLY_3@N  | 7  | 0.0004 | 2.908  | 156.0943 |
| MIH_2@O  | MIH_10@H | MIH_10@N | 7  | 0.0004 | 2.9193 | 154.3373 |
| ACE_1@O  | MIH_10@H | MIH_10@N | 7  | 0.0004 | 2.9381 | 155.7219 |
| MIH_10@O | GLY_7@H  | GLY_7@N  | 7  | 0.0004 | 2.9427 | 153.8193 |
| MIH_10@O | GLY_4@H  | GLY_4@N  | 6  | 0.0003 | 2.8829 | 150.1012 |
| GLY_4@O  | MIH_10@H | MIH_10@N | 5  | 0.0003 | 2.8669 | 158.2397 |
| MIH_10@O | MIH_6@H  | MIH_6@N  | 4  | 0.0002 | 2.8581 | 154.516  |
| GLY_4@O  | NME_11@H | NME_11@N | 4  | 0.0002 | 2.8599 | 164.25   |
| GLY_8@O  | MIH_6@H  | MIH_6@N  | 4  | 0.0002 | 2.9029 | 147.6096 |
| MIH_2@O  | NME_11@H | NME_11@N | 4  | 0.0002 | 2.9237 | 146.8696 |
| MIH_10@O | GLY_5@H  | GLY_5@N  | 3  | 0.0002 | 2.861  | 147.852  |
| MIH_2@O  | GLY_8@H  | GLY_8@N  | 3  | 0.0002 | 2.8987 | 143.7901 |
| ACE_1@O  | MIH_6@H  | MIH_6@N  | 3  | 0.0002 | 2.9012 | 158.9874 |
| MIH_2@O  | MIH_6@H  | MIH_6@N  | 3  | 0.0002 | 2.929  | 145.2159 |
| MIH_2@O  | GLY_7@H  | GLY_7@N  | 3  | 0.0002 | 2.9306 | 151.2682 |
| GLY_7@O  | GLY_5@H  | GLY_5@N  | 3  | 0.0002 | 2.9482 | 164.0803 |



|              |          |          |   |              |        |          |
|--------------|----------|----------|---|--------------|--------|----------|
| GLY_8@O      | MIH_2@H  | MIH_2@N  | 3 | 0.0002       | 2.9585 | 151.8144 |
| GLY_7@O      | MIH_2@H  | MIH_2@N  | 2 | 0.0001       | 2.8744 | 145.217  |
| GLY_4@O      | MIH_2@H  | MIH_2@N  | 2 | 0.0001       | 2.9244 | 148.2908 |
| GLY_3@O      | MIH_10@H | MIH_10@N | 2 | 0.0001       | 2.9429 | 170.6483 |
| MIH_10@O     | MIH_2@H  | MIH_2@N  | 2 | 0.0001       | 2.9467 | 164.2435 |
| MIH_10@O     | GLY_3@H  | GLY_3@N  | 1 | 0.0001       | 2.9103 | 137.865  |
| GLY_9@O      | MIH_2@H  | MIH_2@N  | 1 | 0.0001       | 2.9395 | 144.758  |
| MIH_6@O      | NME_11@H | NME_11@N | 1 | 0.0001       | 2.9558 | 173.4173 |
| <b>Total</b> |          |          |   | <b>11.79</b> |        |          |

**Table S4** List of all hydrogen bonds identified during the QM/MM MD simulation of the Pept<sup>9</sup><sub>3G</sub> apoform with implicit solvent. From left to right, the columns refer to: hydrogen bond acceptor atom, hydrogen bond donor hydrogen atom, donor heavy atom, number of frames in which a given hydrogen bond was detected (note the total number of frames is approximately 20000), fraction of time (from 0 to 1) in which a given hydrogen bond was detected, average donor-acceptor distance (in Å), and average donor-H-acceptor angle (in degrees). Note the accumulated lifetime is given at the end of the table. Note as well residue numbers 1 (residue ACE) and 11 (residue NME) correspond to the two terminal methyl groups, and therefore the residue IDs are +1 with respect to the residue IDs discussed in the main manuscript.

| <b>#Acceptor</b> | <b>DonorH</b> | <b>Donor</b> | <b>Frames</b> | <b>Frac</b> | <b>AvgDist</b> | <b>AvgAng</b> |
|------------------|---------------|--------------|---------------|-------------|----------------|---------------|
| GLY_3@O          | GLY_7@H       | GLY_7@N      | 1958          | 0.1018      | 2.88           | 158.3044      |
| GLY_3@O          | MIH_6@H       | MIH_6@N      | 645           | 0.0335      | 2.9143         | 153.7117      |
| GLY_7@O          | NME_11@H      | NME_11@N     | 511           | 0.0266      | 2.8869         | 155.9729      |
| GLY_7@O          | MIH_10@H      | MIH_10@N     | 346           | 0.018       | 2.9199         | 155.4973      |
| PRO_4@O          | GLY_9@H       | GLY_9@N      | 174           | 0.009       | 2.8823         | 146.9834      |
| GLY_7@O          | GLY_9@H       | GLY_9@N      | 111           | 0.0058      | 2.8501         | 144.9871      |
| PRO_4@O          | MIH_6@H       | MIH_6@N      | 87            | 0.0045      | 2.8943         | 144.1337      |
| PRO_8@O          | MIH_10@H      | MIH_10@N     | 70            | 0.0036      | 2.8935         | 143.1248      |
| GLY_3@O          | GLY_5@H       | GLY_5@N      | 62            | 0.0032      | 2.8747         | 145.3162      |
| GLY_3@O          | NME_11@H      | NME_11@N     | 44            | 0.0023      | 2.8821         | 158.9585      |
| GLY_7@O          | GLY_3@H       | GLY_3@N      | 43            | 0.0022      | 2.9058         | 159.7418      |
| MIH_10@O         | GLY_5@H       | GLY_5@N      | 33            | 0.0017      | 2.9146         | 154.8955      |
| MIH_6@O          | GLY_9@H       | GLY_9@N      | 33            | 0.0017      | 2.9287         | 147.7181      |
| GLY_9@O          | GLY_3@H       | GLY_3@N      | 31            | 0.0016      | 2.8865         | 158.5505      |
| ACE_1@O          | GLY_9@H       | GLY_9@N      | 27            | 0.0014      | 2.868          | 151.8591      |
| MIH_2@O          | GLY_9@H       | GLY_9@N      | 27            | 0.0014      | 2.9029         | 153.7497      |
| PRO_4@O          | GLY_7@H       | GLY_7@N      | 26            | 0.0014      | 2.9099         | 150.8733      |
| GLY_9@O          | NME_11@H      | NME_11@N     | 25            | 0.0013      | 2.9142         | 142.2446      |
| ACE_1@O          | GLY_3@H       | GLY_3@N      | 24            | 0.0012      | 2.933          | 143.2126      |
| MIH_2@O          | MIH_10@H      | MIH_10@N     | 21            | 0.0011      | 2.9393         | 148.7389      |
| GLY_7@O          | GLY_5@H       | GLY_5@N      | 20            | 0.001       | 2.8781         | 151.2832      |
| MIH_10@O         | GLY_7@H       | GLY_7@N      | 17            | 0.0009      | 2.8736         | 154.7412      |
| GLY_9@O          | GLY_5@H       | GLY_5@N      | 15            | 0.0008      | 2.895          | 157.5342      |
| GLY_7@O          | MIH_2@H       | MIH_2@N      | 15            | 0.0008      | 2.8985         | 157.9786      |
| PRO_8@O          | NME_11@H      | NME_11@N     | 13            | 0.0007      | 2.8961         | 153.712       |
| GLY_5@O          | GLY_7@H       | GLY_7@N      | 13            | 0.0007      | 2.9011         | 144.3597      |
| PRO_4@O          | NME_11@H      | NME_11@N     | 12            | 0.0006      | 2.9109         | 158.0943      |
| MIH_2@O          | GLY_5@H       | GLY_5@N      | 12            | 0.0006      | 2.9299         | 147.889       |
| MIH_6@O          | GLY_3@H       | GLY_3@N      | 12            | 0.0006      | 2.936          | 152.2779      |
| PRO_4@O          | MIH_10@H      | MIH_10@N     | 11            | 0.0006      | 2.9064         | 155.0446      |
| MIH_10@O         | GLY_3@H       | GLY_3@N      | 11            | 0.0006      | 2.907          | 149.9275      |
| GLY_3@O          | GLY_9@H       | GLY_9@N      | 11            | 0.0006      | 2.9311         | 148.8482      |
| MIH_10@O         | MIH_2@H       | MIH_2@N      | 10            | 0.0005      | 2.9149         | 151.3628      |
| GLY_3@O          | MIH_10@H      | MIH_10@N     | 8             | 0.0004      | 2.9028         | 151.6664      |
| MIH_10@O         | MIH_6@H       | MIH_6@N      | 8             | 0.0004      | 2.9356         | 156.3425      |

|              |          |          |   |              |        |          |
|--------------|----------|----------|---|--------------|--------|----------|
| MIH_6@O      | MIH_2@H  | MIH_2@N  | 7 | 0.0004       | 2.9368 | 152.4178 |
| MIH_2@O      | NME_11@H | NME_11@N | 7 | 0.0004       | 2.9508 | 145.2459 |
| ACE_1@O      | NME_11@H | NME_11@N | 6 | 0.0003       | 2.9075 | 159.0805 |
| GLY_5@O      | NME_11@H | NME_11@N | 6 | 0.0003       | 2.9109 | 152.9593 |
| GLY_9@O      | MIH_2@H  | MIH_2@N  | 4 | 0.0002       | 2.9145 | 150.8553 |
| PRO_8@O      | MIH_2@H  | MIH_2@N  | 3 | 0.0002       | 2.9136 | 160.2622 |
| GLY_9@O      | MIH_6@H  | MIH_6@N  | 3 | 0.0002       | 2.9233 | 157.5447 |
| MIH_2@O      | MIH_6@H  | MIH_6@N  | 3 | 0.0002       | 2.95   | 155.0058 |
| ACE_1@O      | GLY_7@H  | GLY_7@N  | 1 | 0.0001       | 2.7774 | 145.0489 |
| ACE_1@O      | MIH_10@H | MIH_10@N | 1 | 0.0001       | 2.8831 | 159.7035 |
| MIH_2@O      | GLY_7@H  | GLY_7@N  | 1 | 0.0001       | 2.9581 | 142.4575 |
| PRO_4@O      | MIH_2@H  | MIH_2@N  | 1 | 0.0001       | 2.9693 | 136.4532 |
| GLY_7@O      | MIH_6@H  | MIH_6@N  | 1 | 0.0001       | 2.9836 | 144.6059 |
| MIH_6@O      | MIH_10@H | MIH_10@N | 1 | 0.0001       | 2.9965 | 166.3753 |
| <b>Total</b> |          |          |   | <b>23.59</b> |        |          |

**Table S5** List of all hydrogen bonds identified during the QM/MM MD simulation of the Pept<sup>9</sup><sub>GPG</sub> apoform with implicit solvent. From left to right, the columns refer to: hydrogen bond acceptor atom, hydrogen bond donor hydrogen atom, donor heavy atom, number of frames in which a given hydrogen bond was detected (note the total number of frames is approximately 20000), fraction of time (from 0 to 1) in which a given hydrogen bond was detected, average donor-acceptor distance (in Å), and average donor-H-acceptor angle (in degrees). Note the accumulated lifetime is given at the end of the table. Note as well residue numbers 1 (residue ACE) and 11 (residue NME) correspond to the two terminal methyl groups, and therefore the residue IDs are +1 with respect to the residue IDs discussed in the main manuscript.

| #Acceptor | DonorH   | Donor    | Frames | Frac   | AvgDist | AvgAng   |
|-----------|----------|----------|--------|--------|---------|----------|
| GLY_6@O   | GLY_8@H  | GLY_8@N  | 248    | 0.0128 | 2.8873  | 145.1479 |
| GLY_6@O   | NME_10@H | NME_10@N | 210    | 0.0108 | 2.889   | 159.8586 |
| GLY_3@O   | GLY_7@H  | GLY_7@N  | 187    | 0.0096 | 2.8841  | 150.9704 |
| GLY_3@O   | GLY_8@H  | GLY_8@N  | 171    | 0.0088 | 2.8873  | 151.8764 |
| MIH_2@O   | GLY_4@H  | GLY_4@N  | 107    | 0.0055 | 2.9141  | 144.1075 |
| GLY_3@O   | MIH_5@H  | MIH_5@N  | 96     | 0.0049 | 2.9002  | 143.7966 |
| MIH_5@O   | GLY_8@H  | GLY_8@N  | 95     | 0.0049 | 2.9182  | 150.0832 |
| MIH_5@O   | GLY_7@H  | GLY_7@N  | 93     | 0.0048 | 2.8982  | 144.9737 |
| GLY_6@O   | MIH_9@H  | MIH_9@N  | 82     | 0.0042 | 2.9048  | 152.6675 |
| GLY_7@O   | MIH_9@H  | MIH_9@N  | 78     | 0.004  | 2.8999  | 144.4584 |
| GLY_4@O   | GLY_7@H  | GLY_7@N  | 66     | 0.0034 | 2.9005  | 148.7571 |
| MIH_2@O   | MIH_5@H  | MIH_5@N  | 66     | 0.0034 | 2.9291  | 154.457  |
| GLY_3@O   | GLY_6@H  | GLY_6@N  | 53     | 0.0027 | 2.9116  | 148.7328 |
| ACE_1@O   | GLY_4@H  | GLY_4@N  | 45     | 0.0023 | 2.8944  | 151.9484 |
| GLY_6@O   | GLY_3@H  | GLY_3@N  | 44     | 0.0023 | 2.891   | 158.822  |
| MIH_2@O   | GLY_6@H  | GLY_6@N  | 36     | 0.0019 | 2.9259  | 152.5658 |
| GLY_8@O   | NME_10@H | NME_10@N | 30     | 0.0015 | 2.9277  | 143.0043 |
| GLY_4@O   | GLY_6@H  | GLY_6@N  | 28     | 0.0014 | 2.904   | 145.7611 |
| ACE_1@O   | GLY_3@H  | GLY_3@N  | 27     | 0.0014 | 2.925   | 144.2819 |
| ACE_1@O   | GLY_8@H  | GLY_8@N  | 21     | 0.0011 | 2.9     | 157.7117 |
| GLY_7@O   | GLY_4@H  | GLY_4@N  | 18     | 0.0009 | 2.9207  | 151.1105 |
| GLY_4@O   | GLY_8@H  | GLY_8@N  | 17     | 0.0009 | 2.8906  | 153.0675 |
| MIH_2@O   | GLY_7@H  | GLY_7@N  | 16     | 0.0008 | 2.898   | 146.4786 |
| GLY_7@O   | GLY_3@H  | GLY_3@N  | 14     | 0.0007 | 2.8657  | 155.8258 |
| GLY_3@O   | MIH_9@H  | MIH_9@N  | 14     | 0.0007 | 2.9133  | 152.3677 |
| GLY_3@O   | NME_10@H | NME_10@N | 14     | 0.0007 | 2.9288  | 162.9838 |
| GLY_7@O   | MIH_2@H  | MIH_2@N  | 12     | 0.0006 | 2.8819  | 165.9856 |
| GLY_8@O   | GLY_3@H  | GLY_3@N  | 11     | 0.0006 | 2.8759  | 155.5976 |
| GLY_8@O   | GLY_4@H  | GLY_4@N  | 11     | 0.0006 | 2.8935  | 156.9359 |
| MIH_5@O   | MIH_2@H  | MIH_2@N  | 11     | 0.0006 | 2.9488  | 155.4122 |
| GLY_4@O   | MIH_9@H  | MIH_9@N  | 10     | 0.0005 | 2.8999  | 154.341  |
| GLY_7@O   | NME_10@H | NME_10@N | 10     | 0.0005 | 2.9141  | 147.8452 |
| MIH_9@O   | GLY_6@H  | GLY_6@N  | 9      | 0.0005 | 2.9176  | 146.6791 |
| ACE_1@O   | GLY_6@H  | GLY_6@N  | 7      | 0.0004 | 2.8864  | 163.9489 |
| GLY_4@O   | NME_10@H | NME_10@N | 7      | 0.0004 | 2.8937  | 158.9534 |
| ACE_1@O   | GLY_7@H  | GLY_7@N  | 6      | 0.0003 | 2.8577  | 149.7698 |

|         |          |          |              |             |        |          |
|---------|----------|----------|--------------|-------------|--------|----------|
| MIH_5@O | MIH_9@H  | MIH_9@N  | 6            | 0.0003      | 2.8958 | 152.0844 |
| MIH_2@O | GLY_8@H  | GLY_8@N  | 6            | 0.0003      | 2.9162 | 141.6467 |
| MIH_9@O | GLY_3@H  | GLY_3@N  | 5            | 0.0003      | 2.9291 | 145.9894 |
| MIH_9@O | MIH_5@H  | MIH_5@N  | 5            | 0.0003      | 2.9515 | 157.0493 |
| GLY_8@O | MIH_2@H  | MIH_2@N  | 4            | 0.0002      | 2.8319 | 158.1465 |
| GLY_8@O | MIH_5@H  | MIH_5@N  | 4            | 0.0002      | 2.8552 | 156.8847 |
| ACE_1@O | NME_10@H | NME_10@N | 4            | 0.0002      | 2.8561 | 154.8016 |
| GLY_8@O | GLY_6@H  | GLY_6@N  | 4            | 0.0002      | 2.9012 | 159.6242 |
| MIH_9@O | GLY_4@H  | GLY_4@N  | 4            | 0.0002      | 2.9171 | 146.3207 |
| MIH_2@O | NME_10@H | NME_10@N | 4            | 0.0002      | 2.9184 | 143.9855 |
| MIH_2@O | MIH_9@H  | MIH_9@N  | 4            | 0.0002      | 2.933  | 160.2773 |
| ACE_1@O | MIH_9@H  | MIH_9@N  | 3            | 0.0002      | 2.836  | 153.5137 |
| MIH_5@O | NME_10@H | NME_10@N | 3            | 0.0002      | 2.9165 | 147.2706 |
| ACE_1@O | MIH_5@H  | MIH_5@N  | 3            | 0.0002      | 2.9632 | 140.0127 |
| MIH_5@O | GLY_3@H  | GLY_3@N  | 2            | 0.0001      | 2.7482 | 141.7097 |
| GLY_4@O | MIH_2@H  | MIH_2@N  | 2            | 0.0001      | 2.9692 | 159.8182 |
| GLY_6@O | GLY_4@H  | GLY_4@N  | 1            | 0.0001      | 2.9701 | 137.0208 |
| MIH_9@O | MIH_2@H  | MIH_2@N  | 1            | 0.0001      | 2.9742 | 151.3305 |
|         |          |          | <b>Total</b> | <b>10.5</b> |        |          |

**Table S6** List of all hydrogen bonds identified during the QM/MM MD simulation of the Pept<sup>8</sup><sub>2G-3G</sub> apoform with implicit solvent. From left to right, the columns refer to: hydrogen bond acceptor atom, hydrogen bond donor hydrogen atom, donor heavy atom, number of frames in which a given hydrogen bond was detected (note the total number of frames is approximately 20000), fraction of time (from 0 to 1) in which a given hydrogen bond was detected, average donor-acceptor distance (in Å), and average donor-H-acceptor angle (in degrees). Note the accumulated lifetime is given at the end of the table. Note as well residue numbers 1 (residue ACE) and 10 (residue NME) correspond to the two terminal methyl groups, and therefore the residue IDs are +1 with respect to the residue IDs discussed in the main manuscript.

| #Acceptor | DonorH   | Donor    | Frames | Frac   | AvgDist | AvgAng   |
|-----------|----------|----------|--------|--------|---------|----------|
| GLY_3@O   | GLY_7@H  | GLY_7@N  | 754    | 0.0371 | 2.8779  | 158.0234 |
| GLY_3@O   | GLY_8@H  | GLY_8@N  | 373    | 0.0184 | 2.8862  | 152.1049 |
| GLY_3@O   | MIH_6@H  | MIH_6@N  | 275    | 0.0135 | 2.9169  | 153.2689 |
| GLY_3@O   | GLY_5@H  | GLY_5@N  | 188    | 0.0093 | 2.8767  | 146.7852 |
| GLY_4@O   | GLY_8@H  | GLY_8@N  | 132    | 0.0065 | 2.8929  | 148.0462 |
| MIH_2@O   | GLY_4@H  | GLY_4@N  | 115    | 0.0057 | 2.9064  | 145.7169 |
| MIH_6@O   | GLY_8@H  | GLY_8@N  | 108    | 0.0053 | 2.9102  | 144.6828 |
| GLY_5@O   | GLY_8@H  | GLY_8@N  | 89     | 0.0044 | 2.8939  | 152.3736 |
| MIH_2@O   | GLY_5@H  | GLY_5@N  | 89     | 0.0044 | 2.9253  | 150.4109 |
| GLY_7@O   | MIH_9@H  | MIH_9@N  | 70     | 0.0034 | 2.8882  | 144.4823 |
| GLY_4@O   | MIH_6@H  | MIH_6@N  | 66     | 0.0032 | 2.8969  | 143.983  |
| MIH_6@O   | MIH_9@H  | MIH_9@N  | 63     | 0.0031 | 2.9374  | 153.1904 |
| GLY_4@O   | MIH_9@H  | MIH_9@N  | 53     | 0.0026 | 2.9069  | 151.0583 |
| GLY_8@O   | GLY_5@H  | GLY_5@N  | 51     | 0.0025 | 2.8768  | 157.1594 |
| ACE_1@O   | GLY_4@H  | GLY_4@N  | 40     | 0.002  | 2.9045  | 150.4863 |
| GLY_5@O   | GLY_7@H  | GLY_7@N  | 39     | 0.0019 | 2.9054  | 142.3242 |
| GLY_8@O   | NME_10@H | NME_10@N | 38     | 0.0019 | 2.8974  | 142.5205 |
| GLY_4@O   | NME_10@H | NME_10@N | 32     | 0.0016 | 2.8986  | 156.9252 |
| GLY_8@O   | GLY_4@H  | GLY_4@N  | 31     | 0.0015 | 2.8739  | 156.8424 |
| ACE_1@O   | GLY_3@H  | GLY_3@N  | 30     | 0.0015 | 2.9048  | 141.9304 |
| GLY_7@O   | GLY_4@H  | GLY_4@N  | 23     | 0.0011 | 2.8877  | 157.1277 |
| GLY_4@O   | GLY_7@H  | GLY_7@N  | 23     | 0.0011 | 2.9003  | 153.5001 |
| GLY_3@O   | NME_10@H | NME_10@N | 19     | 0.0009 | 2.9168  | 161.7408 |
| GLY_3@O   | MIH_9@H  | MIH_9@N  | 18     | 0.0009 | 2.8883  | 150.0677 |
| MIH_2@O   | MIH_9@H  | MIH_9@N  | 15     | 0.0007 | 2.9102  | 152.5233 |
| ACE_1@O   | GLY_8@H  | GLY_8@N  | 12     | 0.0006 | 2.8828  | 162.1359 |
| MIH_9@O   | GLY_4@H  | GLY_4@N  | 12     | 0.0006 | 2.9078  | 146.3489 |
| MIH_6@O   | NME_10@H | NME_10@N | 11     | 0.0005 | 2.9035  | 157.8823 |
| MIH_6@O   | GLY_3@H  | GLY_3@N  | 11     | 0.0005 | 2.9111  | 152.5976 |
| GLY_8@O   | GLY_3@H  | GLY_3@N  | 10     | 0.0005 | 2.8566  | 156.4978 |
| ACE_1@O   | NME_10@H | NME_10@N | 10     | 0.0005 | 2.8869  | 157.5946 |
| MIH_9@O   | MIH_2@H  | MIH_2@N  | 10     | 0.0005 | 2.93    | 157.4721 |
| MIH_2@O   | NME_10@H | NME_10@N | 9      | 0.0004 | 2.9107  | 155.7627 |
| MIH_9@O   | MIH_6@H  | MIH_6@N  | 9      | 0.0004 | 2.9145  | 155.2164 |
| MIH_9@O   | GLY_5@H  | GLY_5@N  | 8      | 0.0004 | 2.8747  | 149.6254 |
| GLY_8@O   | MIH_2@H  | MIH_2@N  | 8      | 0.0004 | 2.8939  | 161.4626 |

|              |          |          |   |              |        |          |
|--------------|----------|----------|---|--------------|--------|----------|
| MIH_2@O      | MIH_6@H  | MIH_6@N  | 7 | 0.0003       | 2.9287 | 151.2034 |
| ACE_1@O      | GLY_5@H  | GLY_5@N  | 6 | 0.0003       | 2.8594 | 149.8754 |
| GLY_7@O      | NME_10@H | NME_10@N | 6 | 0.0003       | 2.9096 | 154.6404 |
| GLY_5@O      | MIH_2@H  | MIH_2@N  | 5 | 0.0002       | 2.8755 | 147.8595 |
| MIH_9@O      | GLY_3@H  | GLY_3@N  | 5 | 0.0002       | 2.917  | 148.1186 |
| GLY_7@O      | MIH_2@H  | MIH_2@N  | 5 | 0.0002       | 2.927  | 154.0848 |
| ACE_1@O      | MIH_9@H  | MIH_9@N  | 4 | 0.0002       | 2.8645 | 158.72   |
| MIH_2@O      | GLY_8@H  | GLY_8@N  | 4 | 0.0002       | 2.9498 | 163.5209 |
| MIH_2@O      | GLY_7@H  | GLY_7@N  | 3 | 0.0001       | 2.9018 | 143.1263 |
| ACE_1@O      | MIH_6@H  | MIH_6@N  | 3 | 0.0001       | 2.9166 | 154.1501 |
| GLY_8@O      | MIH_6@H  | MIH_6@N  | 3 | 0.0001       | 2.9461 | 144.9694 |
| GLY_7@O      | GLY_3@H  | GLY_3@N  | 2 | 0.0001       | 2.8768 | 148.5593 |
| MIH_6@O      | MIH_2@H  | MIH_2@N  | 2 | 0.0001       | 2.9286 | 155.9171 |
| ACE_1@O      | GLY_7@H  | GLY_7@N  | 2 | 0.0001       | 2.931  | 161.2361 |
| GLY_7@O      | GLY_5@H  | GLY_5@N  | 2 | 0.0001       | 2.9482 | 161.8298 |
| GLY_5@O      | MIH_9@H  | MIH_9@N  | 1 | 0            | 2.9257 | 163.0251 |
| GLY_5@O      | NME_10@H | NME_10@N | 1 | 0            | 2.9809 | 163.5218 |
| <b>Total</b> |          |          |   | <b>14.24</b> |        |          |

**Table S7** List of all hydrogen bonds identified during the QM/MM MD simulation of the Pept<sup>8</sup><sub>2G-3G</sub> apoform with implicit solvent. From left to right, the columns refer to: hydrogen bond acceptor atom, hydrogen bond donor hydrogen atom, donor heavy atom, number of frames in which a given hydrogen bond was detected (note the total number of frames is approximately 20000), fraction of time (from 0 to 1) in which a given hydrogen bond was detected, average donor-acceptor distance (in Å), and average donor-H-acceptor angle (in degrees). Note the accumulated lifetime is given at the end of the table. Note as well residue numbers 1 (residue ACE) and 10 (residue NME) correspond to the two terminal methyl groups, and therefore the residue IDs are +1 with respect to the residue IDs discussed in the main manuscript.

| #Acceptor | DonorH  | Donor   | Frames | Frac   | AvgDist | AvgAng   |
|-----------|---------|---------|--------|--------|---------|----------|
| GLY_3@O   | GLY_7@H | GLY_7@N | 170    | 0.0092 | 2.8977  | 148.9097 |
| MIH_5@O   | GLY_7@H | GLY_7@N | 124    | 0.0067 | 2.9076  | 144.4154 |
| MIH_5@O   | MIH_8@H | MIH_8@N | 98     | 0.0053 | 2.9312  | 151.6136 |
| GLY_3@O   | MIH_5@H | MIH_5@N | 81     | 0.0044 | 2.899   | 144.4622 |
| MIH_2@O   | GLY_4@H | GLY_4@N | 81     | 0.0044 | 2.9005  | 145.4876 |
| GLY_6@O   | MIH_8@H | MIH_8@N | 76     | 0.0041 | 2.892   | 143.8784 |
| MIH_2@O   | MIH_5@H | MIH_5@N | 76     | 0.0041 | 2.9325  | 153.2701 |
| GLY_4@O   | GLY_7@H | GLY_7@N | 67     | 0.0036 | 2.9203  | 150.902  |
| ACE_1@O   | GLY_4@H | GLY_4@N | 59     | 0.0032 | 2.8874  | 149.5484 |
| GLY_3@O   | MIH_8@H | MIH_8@N | 57     | 0.0031 | 2.9194  | 151.9448 |
| MIH_2@O   | GLY_6@H | GLY_6@N | 42     | 0.0023 | 2.9079  | 156.0776 |
| GLY_4@O   | GLY_6@H | GLY_6@N | 34     | 0.0018 | 2.9045  | 144.2805 |
| GLY_3@O   | GLY_6@H | GLY_6@N | 32     | 0.0017 | 2.9055  | 148.7617 |
| GLY_7@O   | NME_9@H | NME_9@N | 32     | 0.0017 | 2.921   | 142.9699 |
| MIH_5@O   | NME_9@H | NME_9@N | 28     | 0.0015 | 2.9225  | 156.9073 |
| ACE_1@O   | GLY_3@H | GLY_3@N | 26     | 0.0014 | 2.9162  | 142.4152 |
| GLY_3@O   | NME_9@H | NME_9@N | 23     | 0.0012 | 2.9045  | 160.4789 |
| MIH_8@O   | GLY_4@H | GLY_4@N | 13     | 0.0007 | 2.8836  | 147.0329 |
| MIH_8@O   | MIH_2@H | MIH_2@N | 13     | 0.0007 | 2.9253  | 158.122  |
| MIH_8@O   | GLY_3@H | GLY_3@N | 11     | 0.0006 | 2.8877  | 148.3853 |
| GLY_6@O   | NME_9@H | NME_9@N | 11     | 0.0006 | 2.9268  | 153.3033 |
| ACE_1@O   | NME_9@H | NME_9@N | 10     | 0.0005 | 2.9177  | 160.3734 |
| ACE_1@O   | GLY_7@H | GLY_7@N | 9      | 0.0005 | 2.8705  | 157.9581 |
| GLY_7@O   | GLY_3@H | GLY_3@N | 9      | 0.0005 | 2.9412  | 155.5651 |
| GLY_4@O   | MIH_8@H | MIH_8@N | 8      | 0.0004 | 2.8788  | 153.2212 |
| MIH_5@O   | MIH_2@H | MIH_2@N | 8      | 0.0004 | 2.9329  | 160.2779 |
| MIH_2@O   | NME_9@H | NME_9@N | 7      | 0.0004 | 2.9017  | 153.7408 |
| MIH_8@O   | MIH_5@H | MIH_5@N | 7      | 0.0004 | 2.9077  | 147.7103 |
| MIH_2@O   | GLY_7@H | GLY_7@N | 7      | 0.0004 | 2.9253  | 145.9651 |
| GLY_4@O   | NME_9@H | NME_9@N | 6      | 0.0003 | 2.8417  | 147.9796 |
| GLY_7@O   | MIH_2@H | MIH_2@N | 6      | 0.0003 | 2.9405  | 153.85   |
| ACE_1@O   | MIH_8@H | MIH_8@N | 4      | 0.0002 | 2.8922  | 149.3166 |
| GLY_6@O   | GLY_3@H | GLY_3@N | 4      | 0.0002 | 2.9107  | 157.9424 |
| GLY_7@O   | MIH_5@H | MIH_5@N | 3      | 0.0002 | 2.9077  | 150.4977 |
| GLY_7@O   | GLY_4@H | GLY_4@N | 2      | 0.0001 | 2.8335  | 142.8448 |
| ACE_1@O   | MIH_5@H | MIH_5@N | 1      | 0.0001 | 2.7792  | 139.917  |



|              |         |         |   |             |        |          |
|--------------|---------|---------|---|-------------|--------|----------|
| GLY_4@O      | MIH_2@H | MIH_2@N | 1 | 0.0001      | 2.9069 | 172.5264 |
| ACE_1@O      | GLY_6@H | GLY_6@N | 1 | 0.0001      | 2.9183 | 149.7025 |
| GLY_6@O      | GLY_4@H | GLY_4@N | 1 | 0.0001      | 2.9631 | 157.5588 |
| <b>Total</b> |         |         |   | <b>6.75</b> |        |          |

**Table S8** List of all hydrogen bonds identified during the QM/MM MD simulation of the Pept<sup>7</sup> apoform with implicit solvent. From left to right, the columns refer to: hydrogen bond acceptor atom, hydrogen bond donor hydrogen atom, donor heavy atom, number of frames in which a given hydrogen bond was detected (note the total number of frames is approximately 20000), fraction of time (from 0 to 1) in which a given hydrogen bond was detected, average donor-acceptor distance (in Å), and average donor-H-acceptor angle (in degrees). Note the accumulated lifetime is given at the end of the table. Note as well residue numbers 1 (residue ACE) and 9 (residue NME) correspond to the two terminal methyl groups, and therefore the residue IDs are +1 with respect to the residue IDs discussed in the main manuscript.

| #Acceptor    | DonorH  | Donor   | Frames | Frac       | AvgDist | AvgAng   |
|--------------|---------|---------|--------|------------|---------|----------|
| MIH_4@O      | GLY_6@H | GLY_6@N | 151    | 0.0074     | 2.9008  | 143.0568 |
| MIH_2@O      | MIH_4@H | MIH_4@N | 131    | 0.0064     | 2.9108  | 142.9848 |
| GLY_3@O      | GLY_6@H | GLY_6@N | 110    | 0.0054     | 2.9042  | 151.6088 |
| MIH_4@O      | MIH_7@H | MIH_7@N | 88     | 0.0043     | 2.9415  | 153.682  |
| GLY_5@O      | MIH_7@H | MIH_7@N | 74     | 0.0036     | 2.9013  | 144.1374 |
| MIH_4@O      | NME_8@H | NME_8@N | 54     | 0.0027     | 2.9221  | 151.3264 |
| GLY_3@O      | GLY_5@H | GLY_5@N | 47     | 0.0023     | 2.8913  | 144.0601 |
| MIH_7@O      | MIH_2@H | MIH_2@N | 33     | 0.0016     | 2.9228  | 153.792  |
| MIH_2@O      | GLY_6@H | GLY_6@N | 32     | 0.0016     | 2.9318  | 145.408  |
| ACE_1@O      | GLY_3@H | GLY_3@N | 28     | 0.0014     | 2.8948  | 144.0492 |
| GLY_6@O      | NME_8@H | NME_8@N | 26     | 0.0013     | 2.9062  | 145.2781 |
| GLY_6@O      | MIH_2@H | MIH_2@N | 24     | 0.0012     | 2.9325  | 159.1319 |
| MIH_7@O      | MIH_4@H | MIH_4@N | 20     | 0.001      | 2.9205  | 157.7276 |
| GLY_5@O      | MIH_2@H | MIH_2@N | 16     | 0.0008     | 2.9169  | 155.0697 |
| ACE_1@O      | GLY_5@H | GLY_5@N | 13     | 0.0006     | 2.8988  | 153.3561 |
| GLY_6@O      | GLY_3@H | GLY_3@N | 11     | 0.0005     | 2.9025  | 153.1315 |
| GLY_3@O      | MIH_7@H | MIH_7@N | 10     | 0.0005     | 2.9396  | 152.6466 |
| MIH_7@O      | GLY_3@H | GLY_3@N | 8      | 0.0004     | 2.8474  | 152.7994 |
| GLY_6@O      | MIH_4@H | MIH_4@N | 8      | 0.0004     | 2.9232  | 155.8506 |
| GLY_5@O      | NME_8@H | NME_8@N | 8      | 0.0004     | 2.9491  | 150.2356 |
| MIH_2@O      | GLY_5@H | GLY_5@N | 6      | 0.0003     | 2.9148  | 144.6319 |
| ACE_1@O      | MIH_4@H | MIH_4@N | 6      | 0.0003     | 2.9418  | 155.3531 |
| MIH_4@O      | MIH_2@H | MIH_2@N | 5      | 0.0002     | 2.902   | 160.4888 |
| MIH_2@O      | NME_8@H | NME_8@N | 5      | 0.0002     | 2.9102  | 145.793  |
| MIH_2@O      | MIH_7@H | MIH_7@N | 5      | 0.0002     | 2.9584  | 148.6413 |
| GLY_3@O      | NME_8@H | NME_8@N | 1      | 0          | 2.8016  | 169.7221 |
| ACE_1@O      | NME_8@H | NME_8@N | 1      | 0          | 2.9319  | 141.9541 |
| MIH_7@O      | GLY_5@H | GLY_5@N | 1      | 0          | 2.9348  | 142.3034 |
| ACE_1@O      | GLY_6@H | GLY_6@N | 1      | 0          | 2.9541  | 147.8889 |
| <b>Total</b> |         |         |        | <b>4.5</b> |         |          |

**Table S9** List of all hydrogen bonds identified during the QM/MM MD simulation of the Pept<sup>6</sup><sub>G-2G</sub> apoform with implicit solvent. From left to right, the columns refer to: hydrogen bond acceptor atom, hydrogen bond donor hydrogen atom, donor heavy atom, number of frames in which a given hydrogen bond was detected (note the total number of frames is approximately 20000), fraction of time (from 0 to 1) in which a given hydrogen bond was detected, average donor-acceptor distance (in Å), and average donor-H-acceptor angle (in degrees). Note the accumulated lifetime is given at the end of the table. Note as well residue numbers 1 (residue ACE) and 8 (residue NME) correspond to the two terminal methyl groups, and therefore the residue IDs are +1 with respect to the residue IDs discussed in the main manuscript.

| #Acceptor    | DonorH  | Donor   | Frames | Frac        | AvgDist | AvgAng   |
|--------------|---------|---------|--------|-------------|---------|----------|
| MIH_5@O      | MIH_7@H | MIH_7@N | 127    | 0.0063      | 2.9082  | 144.9952 |
| MIH_7@O      | GLY_4@H | GLY_4@N | 124    | 0.0061      | 2.9123  | 147.5652 |
| MIH_2@O      | GLY_4@H | GLY_4@N | 121    | 0.006       | 2.9068  | 144.2411 |
| GLY_3@O      | MIH_5@H | MIH_5@N | 82     | 0.004       | 2.9095  | 143.6877 |
| MIH_2@O      | GLY_6@H | GLY_6@N | 82     | 0.004       | 2.9252  | 154.9145 |
| MIH_2@O      | MIH_5@H | MIH_5@N | 62     | 0.0031      | 2.9261  | 154.3665 |
| ACE_1@O      | GLY_4@H | GLY_4@N | 52     | 0.0026      | 2.9231  | 153.6765 |
| GLY_3@O      | NME_8@H | NME_8@N | 49     | 0.0024      | 2.8967  | 157.6187 |
| GLY_4@O      | GLY_6@H | GLY_6@N | 31     | 0.0015      | 2.9201  | 143.0025 |
| ACE_1@O      | GLY_3@H | GLY_3@N | 27     | 0.0013      | 2.9142  | 145.4752 |
| GLY_3@O      | MIH_7@H | MIH_7@N | 24     | 0.0012      | 2.9199  | 151.945  |
| MIH_7@O      | GLY_3@H | GLY_3@N | 21     | 0.001       | 2.9201  | 147.0023 |
| GLY_4@O      | MIH_7@H | MIH_7@N | 19     | 0.0009      | 2.9069  | 150.5797 |
| GLY_6@O      | NME_8@H | NME_8@N | 19     | 0.0009      | 2.9244  | 143.367  |
| GLY_3@O      | GLY_6@H | GLY_6@N | 16     | 0.0008      | 2.8923  | 149.3829 |
| MIH_5@O      | MIH_2@H | MIH_2@N | 13     | 0.0006      | 2.8781  | 152.0273 |
| MIH_5@O      | NME_8@H | NME_8@N | 9      | 0.0004      | 2.9257  | 146.0922 |
| ACE_1@O      | GLY_6@H | GLY_6@N | 9      | 0.0004      | 2.9469  | 152.4124 |
| ACE_1@O      | MIH_5@H | MIH_5@N | 7      | 0.0003      | 2.9539  | 158.3778 |
| MIH_7@O      | MIH_5@H | MIH_5@N | 6      | 0.0003      | 2.9163  | 156.5813 |
| GLY_4@O      | NME_8@H | NME_8@N | 6      | 0.0003      | 2.9287  | 157.2526 |
| MIH_7@O      | MIH_2@H | MIH_2@N | 5      | 0.0002      | 2.8991  | 151.8919 |
| ACE_1@O      | NME_8@H | NME_8@N | 3      | 0.0001      | 2.8847  | 154.2694 |
| MIH_2@O      | MIH_7@H | MIH_7@N | 2      | 0.0001      | 2.9162  | 157.6013 |
| GLY_4@O      | MIH_2@H | MIH_2@N | 2      | 0.0001      | 2.934   | 149.0547 |
| GLY_6@O      | GLY_4@H | GLY_4@N | 1      | 0           | 2.9444  | 137.7786 |
| <b>Total</b> |         |         |        | <b>4.49</b> |         |          |

**Table S10** List of all hydrogen bonds identified during the QM/MM MD simulation of the Pept<sup>6</sup><sub>2G-G</sub> apoform with implicit solvent. From left to right, the columns refer to: hydrogen bond acceptor atom,

hydrogen bond donor hydrogen atom, donor heavy atom, number of frames in which a given hydrogen bond was detected (note the total number of frames is approximately 20000), fraction of time (from 0 to 1) in which a given hydrogen bond was detected, average donor-acceptor distance (in Å), and average donor-H-acceptor angle (in degrees). Note the accumulated lifetime is given at the end of the table. Note as well residue numbers 1 (residue ACE) and 8 (residue NME) correspond to the two terminal methyl groups, and therefore the residue IDs are +1 with respect to the residue IDs discussed in the main manuscript.

| #Acceptor    | DonorH  | Donor   | Frames | Frac        | AvgDist | AvgAng   |
|--------------|---------|---------|--------|-------------|---------|----------|
| MIH_6@O      | MIH_2@H | MIH_2@N | 158    | 0.0079      | 2.9189  | 156.8119 |
| MIH_4@O      | MIH_6@H | MIH_6@N | 136    | 0.0068      | 2.9137  | 144.2391 |
| MIH_2@O      | MIH_4@H | MIH_4@N | 120    | 0.006       | 2.9172  | 143.5579 |
| MIH_6@O      | GLY_3@H | GLY_3@N | 101    | 0.0051      | 2.9067  | 148.0095 |
| GLY_5@O      | NME_7@H | NME_7@N | 31     | 0.0016      | 2.9042  | 144.3577 |
| GLY_5@O      | MIH_2@H | MIH_2@N | 29     | 0.0015      | 2.8944  | 153.3918 |
| ACE_1@O      | GLY_5@H | GLY_5@N | 25     | 0.0013      | 2.891   | 155.3835 |
| GLY_3@O      | GLY_5@H | GLY_5@N | 23     | 0.0012      | 2.9244  | 143.6728 |
| ACE_1@O      | GLY_3@H | GLY_3@N | 20     | 0.001       | 2.9083  | 145.2975 |
| ACE_1@O      | MIH_4@H | MIH_4@N | 14     | 0.0007      | 2.9484  | 154.6062 |
| MIH_4@O      | MIH_2@H | MIH_2@N | 13     | 0.0007      | 2.9373  | 145.0839 |
| GLY_3@O      | MIH_6@H | MIH_6@N | 8      | 0.0004      | 2.9423  | 161.4659 |
| MIH_6@O      | MIH_4@H | MIH_4@N | 6      | 0.0003      | 2.9324  | 151.7514 |
| MIH_2@O      | NME_7@H | NME_7@N | 5      | 0.0003      | 2.9603  | 138.5456 |
| MIH_2@O      | MIH_6@H | MIH_6@N | 2      | 0.0001      | 2.863   | 142.462  |
| MIH_2@O      | GLY_5@H | GLY_5@N | 2      | 0.0001      | 2.9528  | 164.4862 |
| GLY_3@O      | NME_7@H | NME_7@N | 2      | 0.0001      | 2.9804  | 154.6807 |
| MIH_4@O      | NME_7@H | NME_7@N | 2      | 0.0001      | 2.9916  | 154.4958 |
| <b>Total</b> |         |         |        | <b>3.52</b> |         |          |

**Table S11** List of all hydrogen bonds identified during the QM/MM MD simulation of the Pept<sup>5</sup> apoform with implicit solvent. From left to right, the columns refer to: hydrogen bond acceptor atom, hydrogen bond donor hydrogen atom, donor heavy atom, number of frames in which a given hydrogen bond was detected (note the total number of frames is approximately 20000), fraction of time (from 0 to 1) in which a given hydrogen bond was detected, average donor-acceptor distance (in Å), and average donor-H-acceptor angle (in degrees). Note the accumulated lifetime is given at the end of the table. Note as well residue numbers 1 (residue ACE) and 7 (residue NME) correspond to the two terminal methyl groups, and therefore the residue IDs are +1 with respect to the residue IDs discussed in the main manuscript.

|                              |                              | Al-Pept <sup>9</sup> <sub>3G</sub> |        | Al-Pept <sup>9</sup> <sub>GPG</sub> |       | Al-Pept <sup>8</sup> <sub>2G-3G</sub> |       | Al-Pept <sup>8</sup> <sub>3G-2G</sub> |       |       |
|------------------------------|------------------------------|------------------------------------|--------|-------------------------------------|-------|---------------------------------------|-------|---------------------------------------|-------|-------|
|                              |                              | DFT                                | PM6    | DFT                                 | PM6   | DFT                                   | PM6   | DFT                                   | PM6   |       |
| Atom1                        | Atom2                        | Distances                          |        |                                     |       |                                       |       |                                       |       |       |
| Al                           | O <sub>C</sub> <sup>A</sup>  | 1.952                              | 1.950  | 1.951                               | 1.956 | 1.952                                 | 1.958 | 1.963                                 | 1.951 |       |
| Al                           | O <sub>OH</sub> <sup>A</sup> | 1.911                              | 1.906  | 1.912                               | 1.909 | 1.921                                 | 1.912 | 1.921                                 | 1.920 |       |
| Al                           | O <sub>C</sub> <sup>B</sup>  | 1.970                              | 1.951  | 1.973                               | 1.957 | 1.965                                 | 1.957 | 1.959                                 | 1.957 |       |
| Al                           | O <sub>OH</sub> <sup>B</sup> | 1.919                              | 1.926  | 1.922                               | 1.926 | 1.927                                 | 1.931 | 1.929                                 | 1.917 |       |
| Al                           | O <sub>C</sub> <sup>C</sup>  | 1.949                              | 1.946  | 1.950                               | 1.942 | 1.951                                 | 1.941 | 1.948                                 | 1.947 |       |
| Al                           | O <sub>OH</sub> <sup>C</sup> | 1.914                              | 1.916  | 1.911                               | 1.911 | 1.911                                 | 1.907 | 1.902                                 | 1.905 |       |
| Atom1                        | Atom2                        | Atom3                              | Angles |                                     |       |                                       |       |                                       |       |       |
| Al                           | O <sub>C</sub> <sup>A</sup>  | C <sub>C</sub> <sup>A</sup>        | 111.7  | 107.4                               | 111.2 | 107.1                                 | 111.3 | 107.2                                 | 109.5 | 106.5 |
| Al                           | O <sub>OH</sub> <sup>A</sup> | C <sub>OH</sub> <sup>A</sup>       | 111.9  | 107.6                               | 111.1 | 106.9                                 | 110.7 | 106.8                                 | 110.0 | 106.8 |
| Al                           | O <sub>C</sub> <sup>B</sup>  | C <sub>C</sub> <sup>B</sup>        | 112.1  | 108.3                               | 112.2 | 108.4                                 | 112.2 | 108.4                                 | 112.0 | 108.3 |
| Al                           | O <sub>OH</sub> <sup>B</sup> | C <sub>OH</sub> <sup>B</sup>       | 112.8  | 108.4                               | 112.7 | 108.5                                 | 112.3 | 108.1                                 | 112.6 | 108.9 |
| Al                           | O <sub>C</sub> <sup>C</sup>  | C <sub>C</sub> <sup>C</sup>        | 110.0  | 106.7                               | 109.8 | 106.6                                 | 110.2 | 106.7                                 | 111.1 | 106.7 |
| Al                           | O <sub>OH</sub> <sup>C</sup> | C <sub>OH</sub> <sup>C</sup>       | 110.0  | 106.5                               | 110.0 | 106.5                                 | 110.5 | 106.6                                 | 111.5 | 106.9 |
| O <sub>C</sub> <sup>A</sup>  | Al                           | O <sub>OH</sub> <sup>A</sup>       | 83.8   | 88.7                                | 83.8  | 88.1                                  | 83.5  | 87.9                                  | 83.2  | 88.1  |
| O <sub>C</sub> <sup>A</sup>  | Al                           | O <sub>C</sub> <sup>B</sup>        | 92.7   | 92.1                                | 93.3  | 96.0                                  | 95.2  | 98.9                                  | 88.8  | 83.4  |
| O <sub>C</sub> <sup>A</sup>  | Al                           | O <sub>OH</sub> <sup>B</sup>       | 90.9   | 87.5                                | 90.1  | 85.1                                  | 88.4  | 81.0                                  | 92.7  | 98.0  |
| O <sub>C</sub> <sup>A</sup>  | Al                           | O <sub>C</sub> <sup>C</sup>        | 174.4  | 178.1                               | 174.1 | 174.2                                 | 173.9 | 172.0                                 | 172.9 | 171.6 |
| O <sub>C</sub> <sup>A</sup>  | Al                           | O <sub>OH</sub> <sup>C</sup>       | 92.2   | 89.9                                | 91.3  | 86.4                                  | 90.9  | 87.0                                  | 93.9  | 91.7  |
| O <sub>OH</sub> <sup>A</sup> | Al                           | O <sub>C</sub> <sup>B</sup>        | 89.0   | 86.4                                | 87.4  | 81.4                                  | 86.2  | 79.9                                  | 87.5  | 85.5  |
| O <sub>OH</sub> <sup>A</sup> | Al                           | O <sub>OH</sub> <sup>B</sup>       | 170.3  | 173.1                               | 168.2 | 166.4                                 | 165.8 | 161.7                                 | 169.8 | 170.4 |
| O <sub>OH</sub> <sup>A</sup> | Al                           | O <sub>C</sub> <sup>C</sup>        | 92.8   | 92.3                                | 94.0  | 95.0                                  | 95.1  | 99.2                                  | 90.2  | 83.5  |
| O <sub>OH</sub> <sup>A</sup> | Al                           | O <sub>OH</sub> <sup>C</sup>       | 99.8   | 100.0                               | 100.9 | 102.3                                 | 101.3 | 101.1                                 | 99.4  | 100.5 |
| O <sub>C</sub> <sup>B</sup>  | Al                           | O <sub>OH</sub> <sup>B</sup>       | 83.2   | 88.0                                | 82.9  | 87.6                                  | 83.0  | 87.4                                  | 83.1  | 87.8  |
| O <sub>C</sub> <sup>B</sup>  | Al                           | O <sub>C</sub> <sup>C</sup>        | 91.7   | 89.6                                | 92.1  | 89.3                                  | 90.6  | 86.0                                  | 93.5  | 96.1  |
| O <sub>C</sub> <sup>B</sup>  | Al                           | O <sub>OH</sub> <sup>C</sup>       | 170.4  | 173.3                               | 170.9 | 175.7                                 | 170.9 | 174.1                                 | 172.7 | 172.2 |
| O <sub>OH</sub> <sup>B</sup> | Al                           | O <sub>C</sub> <sup>C</sup>        | 93.0   | 91.6                                | 93.0  | 92.8                                  | 94.1  | 93.0                                  | 94.3  | 90.4  |

|                              |    |                              |      |      |      |      |      |      |      |      |
|------------------------------|----|------------------------------|------|------|------|------|------|------|------|------|
| O <sub>OH</sub> <sup>B</sup> | Al | O <sub>OH</sub> <sup>C</sup> | 88.5 | 85.7 | 89.2 | 89.1 | 90.4 | 92.9 | 90.1 | 86.8 |
| O <sub>C</sub> <sup>C</sup>  | Al | O <sub>OH</sub> <sup>C</sup> | 83.9 | 88.3 | 83.8 | 88.2 | 83.6 | 88.1 | 84.5 | 89.6 |

**Table S12.** Distances (in Å) and angles (in degrees) computed on the Al.Pept<sup>9</sup><sub>3G</sub>, Al.Pept<sup>9</sup><sub>GPG</sub>, Al.Pept<sup>9</sup><sub>2G-3G</sub> and Al.Pept<sup>9</sup><sub>3G-2G</sub> complexes characterized at two level of theories: B3LYP/6-31+G(d,p) and PM6.

|                              |                              | Al-Pept <sup>7</sup> <sub>hexa</sub> |        | Al-Pept <sup>7</sup> <sub>penta</sub> |       | Al-Pept <sup>6</sup> <sub>G-2G</sub> |       | Al-Pept <sup>6</sup> <sub>2G-G</sub> |       | Al-Pept <sup>5</sup> |       |       |
|------------------------------|------------------------------|--------------------------------------|--------|---------------------------------------|-------|--------------------------------------|-------|--------------------------------------|-------|----------------------|-------|-------|
|                              |                              | DFT                                  | PM6    | DFT                                   | PM6   | DFT                                  | PM6   | DFT                                  | PM6   | DFT                  | PM6   |       |
| Atom1                        | Atom2                        | Distances                            |        |                                       |       |                                      |       |                                      |       |                      |       |       |
| Al                           | O <sub>C</sub> <sup>A</sup>  | 1.936                                | 1.920  | 1.916                                 | 1.884 | 1.919                                | 1.914 | 1.888                                | 1.915 | 1.890                | 1.883 |       |
| Al                           | O <sub>OH</sub> <sup>A</sup> | 1.917                                | 1.932  | 1.866                                 | 1.914 | 1.880                                | 1.888 | 1.887                                | 1.885 | 1.891                | 1.908 |       |
| Al                           | O <sub>C</sub> <sup>B</sup>  | 1.990                                | 1.963  | 4.394                                 | 3.950 | 4.525                                | 4.335 | 4.490                                | 4.325 | 4.435                | 4.136 |       |
| Al                           | O <sub>OH</sub> <sup>B</sup> | 1.919                                | 1.936  | 1.793                                 | 1.820 | 1.809                                | 1.827 | 1.806                                | 1.822 | 1.809                | 1.822 |       |
| Al                           | O <sub>C</sub> <sup>C</sup>  | 1.954                                | 1.935  | 1.896                                 | 1.940 | 1.877                                | 1.887 | 1.918                                | 1.894 | 1.925                | 1.927 |       |
| Al                           | O <sub>OH</sub> <sup>C</sup> | 1.912                                | 1.917  | 1.886                                 | 1.873 | 1.897                                | 1.916 | 1.867                                | 1.918 | 1.865                | 1.896 |       |
| Atom1                        | Atom2                        | Atom3                                | Angles |                                       |       |                                      |       |                                      |       |                      |       |       |
| Al                           | O <sub>C</sub> <sup>A</sup>  | C <sub>C</sub> <sup>A</sup>          | 110.9  | 107.5                                 | 111.8 | 108.4                                | 112.4 | 108.0                                | 112.5 | 107.9                | 110.8 | 107.0 |
| Al                           | O <sub>OH</sub> <sup>A</sup> | C <sub>OH</sub> <sup>A</sup>         | 111.1  | 107.1                                 | 112.6 | 107.3                                | 112.8 | 108.0                                | 112.1 | 108.3                | 110.0 | 106.1 |
| Al                           | O <sub>C</sub> <sup>B</sup>  | C <sub>C</sub> <sup>B</sup>          | 110.3  | 106.9                                 | -     | -                                    | -     | -                                    | -     | -                    | -     | -     |
| Al                           | O <sub>OH</sub> <sup>B</sup> | C <sub>OH</sub> <sup>B</sup>         | 111.3  | 106.7                                 | 134.0 | 108.2                                | 124.8 | 110.6                                | 129.2 | 110.1                | 122.7 | 107.1 |
| Al                           | O <sub>C</sub> <sup>C</sup>  | C <sub>C</sub> <sup>C</sup>          | 108.3  | 106.1                                 | 112.0 | 107.0                                | 112.7 | 108.1                                | 111.1 | 108.5                | 110.8 | 107.7 |
| Al                           | O <sub>OH</sub> <sup>C</sup> | C <sub>OH</sub> <sup>C</sup>         | 108.5  | 106.0                                 | 111.6 | 107.3                                | 111.6 | 107.4                                | 112.0 | 107.2                | 111.5 | 107.8 |
| O <sub>C</sub> <sup>A</sup>  | Al                           | O <sub>OH</sub> <sup>A</sup>         | 84.1   | 89.2                                  | 84.9  | 89.8                                 | 84.5  | 89.4                                 | 85.0  | 89.5                 | 84.7  | 89.9  |
| O <sub>C</sub> <sup>A</sup>  | Al                           | O <sub>C</sub> <sup>B</sup>          | 87.6   | 84.3                                  | -     | -                                    | -     | -                                    | -     | -                    | -     | -     |
| O <sub>C</sub> <sup>A</sup>  | Al                           | O <sub>OH</sub> <sup>B</sup>         | 169.1  | 170.7                                 | 98.9  | 119.4                                | 96.6  | 99.7                                 | 107.2 | 97.7                 | 133.1 | 124.8 |
| O <sub>C</sub> <sup>A</sup>  | Al                           | O <sub>C</sub> <sup>C</sup>          | 93.9   | 92.3                                  | 88.1  | 80.5                                 | 89.6  | 83.5                                 | 89.0  | 82.1                 | 88.9  | 87.0  |
| O <sub>C</sub> <sup>A</sup>  | Al                           | O <sub>OH</sub> <sup>C</sup>         | 100.9  | 101.5                                 | 158.9 | 122.9                                | 164.1 | 158.0                                | 143.4 | 157.3                | 114.1 | 115.4 |
| O <sub>OH</sub> <sup>A</sup> | Al                           | O <sub>C</sub> <sup>B</sup>          | 91.4   | 88.7                                  | 111.8 | 101.5                                | 116.7 | 118.3                                | 103.5 | 115.1                | 94.7  | 96.4  |
| O <sub>OH</sub> <sup>A</sup> | Al                           | O <sub>OH</sub> <sup>B</sup>         | 90.9   | 91.9                                  | -     | -                                    | -     | -                                    | -     | -                    | -     | -     |
| O <sub>OH</sub> <sup>A</sup> | Al                           | O <sub>C</sub> <sup>C</sup>          | 175.0  | 173.4                                 | 143.3 | 166.8                                | 130.8 | 132.4                                | 159.2 | 132.3                | 172.3 | 169.7 |
| O <sub>OH</sub> <sup>A</sup> | Al                           | O <sub>OH</sub> <sup>C</sup>         | 92.3   | 85.2                                  | 88.6  | 87.8                                 | 87.5  | 80.1                                 | 88.1  | 81.0                 | 92.9  | 83.3  |
| O <sub>C</sub> <sup>B</sup>  | Al                           | O <sub>OH</sub> <sup>B</sup>         | 82.8   | 86.6                                  | -     | -                                    | -     | -                                    | -     | -                    | -     | -     |
| O <sub>C</sub> <sup>B</sup>  | Al                           | O <sub>C</sub> <sup>C</sup>          | 93.2   | 97.8                                  | -     | -                                    | -     | -                                    | -     | -                    | -     | -     |
| O <sub>C</sub> <sup>B</sup>  | Al                           | O <sub>OH</sub> <sup>C</sup>         | 171.0  | 171.5                                 | -     | -                                    | -     | -                                    | -     | -                    | -     | -     |
| O <sub>OH</sub> <sup>B</sup> | Al                           | O <sub>C</sub> <sup>C</sup>          | 91.7   | 87.5                                  | 104.9 | 91.1                                 | 112.5 | 109.3                                | 97.3  | 112.6                | 92.8  | 93.4  |



|                              |    |                              |      |      |       |       |      |       |       |       |       |       |
|------------------------------|----|------------------------------|------|------|-------|-------|------|-------|-------|-------|-------|-------|
| O <sub>OH</sub> <sup>B</sup> | Al | O <sub>OH</sub> <sup>C</sup> | 89.0 | 87.7 | 102.1 | 117.0 | 99.3 | 102.3 | 109.4 | 104.9 | 112.8 | 119.8 |
| O <sub>C</sub> <sup>C</sup>  | Al | O <sub>OH</sub> <sup>C</sup> | 83.5 | 88.3 | 85.1  | 90.1  | 85.3 | 89.3  | 84.9  | 89.1  | 85.8  | 89.2  |

**Table S13.** Distances (in Å) and angles (in degrees) computed on the Al.Pept<sup>7</sup>, Al.Pept<sup>6</sup><sub>G-2G</sub>, Al.Pept<sup>6</sup><sub>2G-G</sub> and Al.Pept<sup>5</sup> complexes characterized at two level of theories: B3LYP/6-31+G(d,p) and PM6.

|                                       | DFT                    |                        |                              |                              | PM6                    |                        |                              |                              |
|---------------------------------------|------------------------|------------------------|------------------------------|------------------------------|------------------------|------------------------|------------------------------|------------------------------|
|                                       | $\Delta H_{\text{aq}}$ | $\Delta G_{\text{aq}}$ | $\Delta\Delta H_{\text{aq}}$ | $\Delta\Delta G_{\text{aq}}$ | $\Delta H_{\text{aq}}$ | $\Delta G_{\text{aq}}$ | $\Delta\Delta H_{\text{aq}}$ | $\Delta\Delta G_{\text{aq}}$ |
| Al.Pept <sup>9</sup> <sub>3G</sub>    | -25.9                  | -97.0                  | 0.0                          | 0.0                          | -6.9                   | -92.4                  | 0.0                          | 0.0                          |
| Al.Pept <sup>9</sup> <sub>GPG</sub>   | 6.5                    | -70.3                  | 32.4                         | 26.6                         | 14.0                   | -73.4                  | 20.9                         | 18.9                         |
| Al.Pept <sup>8</sup> <sub>2G-3G</sub> | -8.8                   | -80.2                  | 17.1                         | 16.7                         | -5.0                   | -87.7                  | 2.0                          | 4.7                          |
| Al.Pept <sup>8</sup> <sub>3G-2G</sub> | -21.7                  | -90.3                  | 4.2                          | 6.6                          | -6.7                   | -86.6                  | 0.2                          | 5.7                          |
| Al.Pept <sup>7</sup> (C.N.=6)         | -3.0                   | -72.6                  | 23.0                         | 24.4                         | 5.6                    | -80.1                  | 12.6                         | 12.3                         |
| Al.Pept <sup>7</sup> (C.N.=5)         | -1.0                   | -73.2                  | 25.0                         | 23.7                         | -3.8                   | -87.6                  | 3.1                          | 4.8                          |
| Al.Pept <sup>6</sup> <sub>G-2G</sub>  | 14.9                   | -59.6                  | 40.8                         | 37.4                         | -3.4                   | -83.7                  | 3.5                          | 8.7                          |
| Al.Pept <sup>6</sup> <sub>2G-G</sub>  | 1.8                    | -70.2                  | 27.7                         | 26.8                         | -5.6                   | -85.9                  | 1.4                          | 6.5                          |
| Al.Pept <sup>5</sup>                  | -8.2                   | -73.8                  | 17.8                         | 23.2                         | -4.5                   | -83.5                  | 2.5                          | 8.9                          |

**Table S14.** Enthalpies ( $\Delta H_{\text{aq}}$ ) and Gibbs free energies ( $\Delta G_{\text{aq}}$ ) in solution (in kcal/mol) of the eight Al.Peptide complexes computed according to reaction 3 at two level of theories: PM6 and B3LYP/6-311++G(3df,2p)/B3LYP/6-31+G(d) (DFT). The relative  $\Delta\Delta H_{\text{aq}}$  and  $\Delta\Delta G_{\text{aq}}$  values, taking Pepti<sup>9</sup><sub>3G</sub> as reference, are also shown.

## Electron Delocalization Indices

Electron delocalization indices (DIs) were calculated on the most representative structures (shown in Figure 2). These indices are a measure of the covariance between the population of two atoms A and B and, consequently, a measure of the number of electrons simultaneously fluctuating between these atoms:

$$\delta(A,B)=\int A[\text{Bd}1d2\rho_{xc}(1,2)=\text{cov}(N_A,N_B)$$

where  $\rho_{xc}(1,2)$  is the exchange-correlation density and it can be taken as the number of electron pairs shared between atoms A and B, i. e., the bond order.<sup>1,2</sup> The AIMAll v17.11.14 program<sup>3</sup> was used to carry out the QTAIM analysis<sup>4</sup> (what includes the characterization of DIs) on the previously optimized structures. Densities for QTAIM analysis were obtained at the B3LYP/6-311++g(3df,2p) level of theory using the IEFPCM solvation model.

Delocalization indices (D.I.) are a measure of the electron sharing between two atoms. Although Al-O bonds are mainly electrostatic in nature, there are also important dative interactions from the lone pair of the oxygens to the formally vacant 3s and 3p orbitals of Al(III).<sup>5</sup> Therefore, the higher the D. I. value, the stronger the covalent character of the bond between the two atoms. The D.I. were computed at the bonds formed by Al(III) and the six oxygen atoms of the three Mimosine residues in all Al-Pept complexes (Table S15).

Starting from the Al.Pept<sup>9</sup> complex, it can be observed that the D.I. values are ca 0.02 a.u. higher at Al-O<sub>OH</sub> (ca 0.17 a.u.) than at Al-O<sub>C</sub> (ca 0.15 a.u.). This is in agreement with the shorter bond distances of the formers (Table 1): the shorter the distance, the higher the D.I. value. However, a closer analysis of the values indicates that the values are about 0.005 a.u. smaller at the central Mimosine residues. Even if the difference is small, it suggests that the interaction with the central Mimosine is the weakest one among the three Mimosine residues (note this residue weakens its interaction with Al(III) with the shortest peptides). The total electron delocalization computed for the six Al-O bonds is 0.9590 a.u. These trends and values are maintained by Pept<sup>8</sup> and Pept<sup>9</sup> peptides, in which Al(III) is hexacoordinated, and in all of them the accumulated D.I. value is maintained in a narrow range between 0.9579-0.9590 a.u. We also add in Table S15 the values for the Al-DFP<sub>3</sub> complex, which demonstrates that the electronic structure of the Al.Pept<sup>9</sup> complex resembles the one of Al.DFP<sub>3</sub>. In this sense, the D.I. for Al-O<sub>OH</sub> bonds are larger than for Al-O<sub>C</sub> and the accumulative D.I. is 0.9580. That is, the four Al.Pept<sup>9</sup> and Al.Pept<sup>8</sup> complexes have adopted the optimum interaction with respect to the three mimosine residues, and in this sense, an efficient

| Complex                            | L. I.  | D. I.             |                    |                   |                    |                   |                    | Total  |
|------------------------------------|--------|-------------------|--------------------|-------------------|--------------------|-------------------|--------------------|--------|
|                                    | Al     | Al-O <sub>C</sub> | Al-O <sub>OH</sub> | Al-O <sub>C</sub> | Al-O <sub>OH</sub> | Al-O <sub>C</sub> | Al-O <sub>OH</sub> |        |
| Pept <sup>9</sup> <sub>3G</sub>    | 9.9493 | 0.1520            | 0.1722             | 0.1472            | 0.1641             | 0.1546            | 0.1689             | 0.9590 |
| Pept <sup>9</sup> <sub>GPG</sub>   | 9.9494 | 0.1516            | 0.1720             | 0.1462            | 0.1632             | 0.1550            | 0.1704             | 0.9584 |
| Pept <sup>8</sup> <sub>2G-3G</sub> | 9.9498 | 0.1513            | 0.1694             | 0.1481            | 0.1627             | 0.1550            | 0.1714             | 0.9579 |
| Pept <sup>8</sup> <sub>3G-2G</sub> | 9.9496 | 0.1493            | 0.1665             | 0.1486            | 0.1648             | 0.1544            | 0.1749             | 0.9586 |
| Pept <sup>7</sup> (hexa)           | 9.9498 | 0.1626            | 0.1659             | 0.1418            | 0.1628             | 0.1550            | 0.1700             | 0.9581 |
| Pept <sup>7</sup> (penta)          | 9.9459 | 0.1744            | 0.2036             | 0.0005            | 0.2228             | 0.1875            | 0.1881             | 0.9769 |
| Pept <sup>6</sup> <sub>G-2G</sub>  | 9.9475 | 0.1714            | 0.1999             | 0.0006            | 0.2290             | 0.1989            | 0.1798             | 0.9796 |
| Pept <sup>6</sup> <sub>2G-G</sub>  | 9.9466 | 0.1924            | 0.1876             | 0.0005            | 0.2220             | 0.1734            | 0.2029             | 0.9789 |
| Pept <sup>5</sup>                  | 9.9474 | 0.1973            | 0.1823             | 0.0006            | 0.2283             | 0.1666            | 0.2011             | 0.9761 |
| Al.DFP <sub>3</sub>                |        | 0.1540            | 0.1657             | 0.1522            | 0.1665             | 0.1531            | 0.1665             | 0.9580 |

**Table S15.** Electron localization index (L.I.) for the aluminum atom and electron delocalization indices (D. I.) for the aluminum-Mimosine oxygen bonds (a. u.). All structures were optimized in solution and refined at the B3LYP-D3(BJ)/6-311++G(3df,2p) level of theory (see Methodology).

chelation of the aluminum ion is expected for these polypeptides.

For the Al.Pept<sup>7</sup> complex two coordination modes were observed during the MD simulation of this complex and therefore two distinct structures were selected, with Al(III) hexa- or pentacoordinated. For Al(III) hexacoordinated structure, the D. I. values of Mim<sup>4</sup> and Mim<sup>7</sup> are very similar to the ones observed for the Pept<sup>8</sup> and Pept<sup>9</sup> peptides (again, the D.I. values are slightly smaller in the central Mimosine), while the two D.I. values computed on the first Mimosine residue are now almost the same (0.16 a.u.), although the accumulated D.I. maintains in 0.958 a.u.

A different scenario emerges when Al(III) is pentacoordinated by Pept<sup>7</sup>. The D.I. value of Al-O<sub>C</sub><sup>4</sup> is almost vanished (0.0005 a.u.), since the O<sub>C</sub><sup>4</sup> atom is not present in the first coordination shell of the cation. Interestingly, the loss of O<sub>C</sub><sup>4</sup> atom interaction has strengthened the other five Al-O interactions, when comparing with the Al-Pept<sup>7</sup><sub>hexa</sub> structure. For instance, the D.I. value of the Al(III)-O<sub>OH</sub><sup>4</sup> bond increased to 0.2228 a.u., 0.06 a.u. higher than the same bond in the hexacoordinated complex. The indices of the other Al-O bonds have also incremented, namely 0.04 a. u. at Al-O<sub>OH</sub><sup>1</sup>, 0.03 a.u. at Al-O<sub>C</sub><sup>7</sup>, ca 0.1 at Al-O<sub>C</sub><sup>1</sup> and 0.1 a.u. at Al-O<sub>OH</sub><sup>7</sup>. As a consequence, the accumulated D.I. is equal to 0.9769 a.u., 0.02 a.u. higher than in its counterpart with a hexacoordinated Al(III). This pattern is maintained by the three shortest peptides, in which Al(III) is pentacoordinated: the loss of one Al-O interaction has enlarged the indices of the other Al-O bond, and the accumulated D. I. value is ca. 0.98 in all of them.

In summary, the computed delocalization indices show that the reduction in the Al(III) coordination mode (from six to five) leads to an increment on the total dative interactions between Al(III) and the ligands. Nevertheless, note that this increment corresponds to the covalent part of the Al(III)-O bonds, and as we show in the next section this slightly enhanced covalent interactions between aluminum and mimosine can not compensated the loss of one Al-O electrostatic interaction in the first coordination shell when shifting from coordination number six to five.

## REFERENCES

- 1 X. Fradera, M. A. Austen and R. F. W. Bader, The Lewis Model and Beyond, *J Phys Chem A*, 1999, **103**, 304–314.
- 2 R. F. W. Bader and M. E. Stephens, Spatial localization of the electronic pair and number distributions in molecules, *J Am Chem Soc*, 1975, **97**, 7391–7399.
- 3 T. A. Keith, *AIMAll Version 17.11.14*, TK Gristmill Software, Overland Park KS, USA, 2017.
- 4 R. F. W. Bader, *Atoms in Molecules, A Quantum Theory.*, Oxford University Press, Oxford, 1990.
- 5 G. Dalla Torre, J. I. Mujika, E. Formoso, E. Matito, M. J. Ramos and X. Lopez, Tuning the affinity of catechols and salicylic acids towards Al(III): characterization of Al–chelator interactions, *Dalton Trans*, , DOI:10.1039/c8dt01341a.
